# Supplementary material for: Chronic colitis upregulates microRNAs suppressing brain-derived neurotrophic factor in the adult heart
Source: PubMed Central journal article supplement (PMC8452076; doi:10.1371/journal.pone.0257280), 2021-09-20
Supplement: pone.0257280.s001.pdf [file pone.0257280.s001.pdf]

## Control

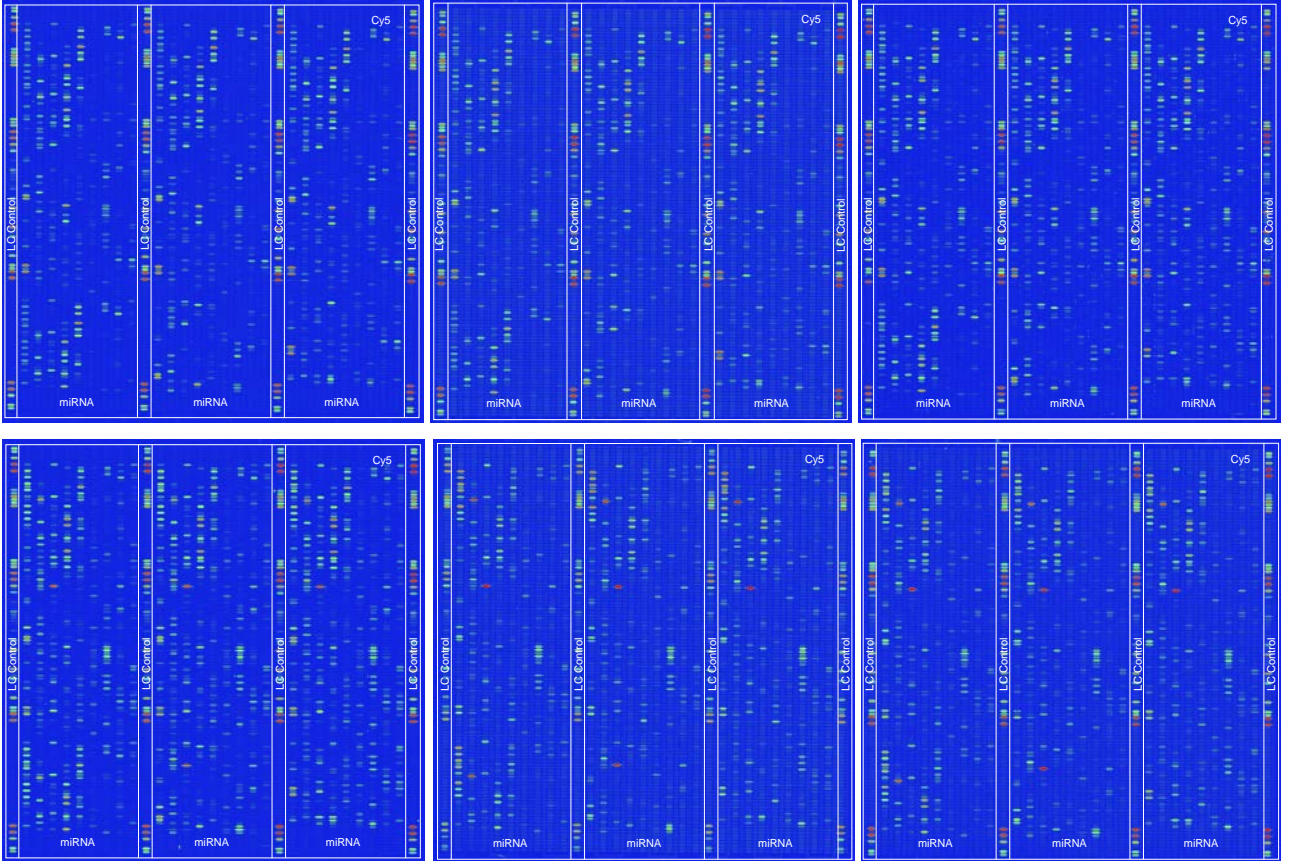

## DSS

**Fig S1. Chip images of all 6 samples (n=3).**
