# Supplementary material for: Chronic colitis upregulates microRNAs suppressing brain-derived neurotrophic factor in the adult heart
Source: PubMed Central journal article supplement (PMC8452076; doi:10.1371/journal.pone.0257280), 2021-09-20
Supplement: pone.0257280.s002.pdf [file pone.0257280.s002.pdf]

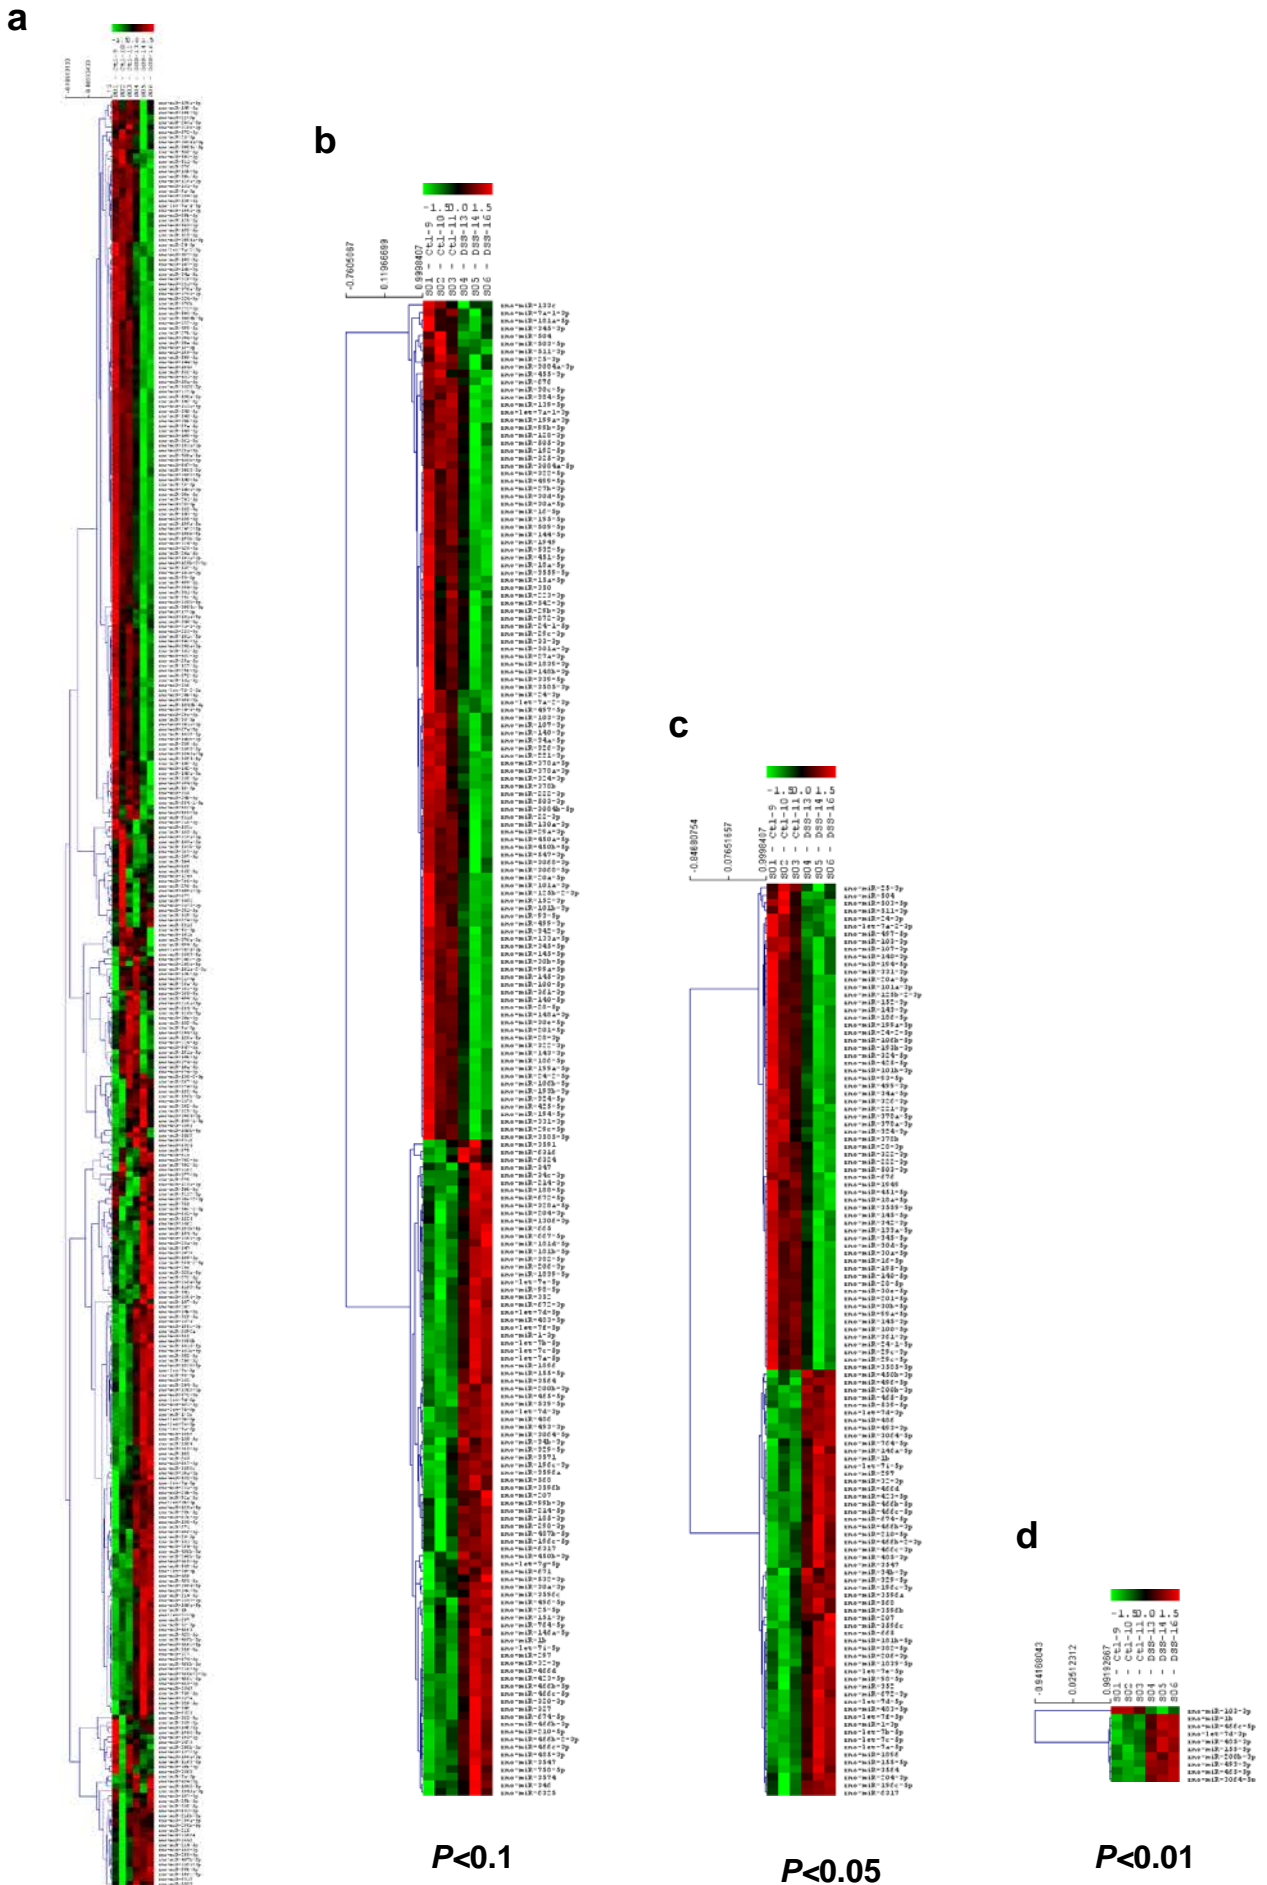

**Fig S2. Clustering graphs of miRNA microarrays.** (A) Clustering graph of all miRNAs with signal intensity >32 (all detectable miRNAs). Altered miRNAs were also clustered based on the p values. (B)  $P < 0.1$ . (C)  $P < 0.05$ . (D)  $P < 0.01$ .
