# Supplementary material for: Chronic colitis upregulates microRNAs suppressing brain-derived neurotrophic factor in the adult heart
Source: PubMed Central journal article supplement (PMC8452076; doi:10.1371/journal.pone.0257280), 2021-09-20
Supplement: pone.0257280.s003.pdf [file pone.0257280.s003.pdf]

**Table S1. Cardiac miRNAs significantly decreased by DSS colitis**

| miRNA Name      | p-value  | Control<br>Mean | DSS<br>Mean | Log2(G2/G1) |
|-----------------|----------|-----------------|-------------|-------------|
| rno-miR-103-3p  | 8.48E-03 | 1,491           | 842         | -0.82       |
| rno-miR-145-5p  | 1.06E-02 | 9,562           | 4,926       | -0.96       |
| rno-miR-107-3p  | 1.22E-02 | 1,467           | 845         | -0.79       |
| rno-miR-378a-5p | 1.91E-02 | 421             | 112         | -1.91       |
| rno-miR-99a-5p  | 1.93E-02 | 5,001           | 877         | -2.51       |
| rno-miR-30b-5p  | 1.95E-02 | 8,765           | 2,148       | -2.03       |
| rno-miR-425-5p  | 2.03E-02 | 476             | 72          | -2.72       |
| rno-miR-186-5p  | 2.05E-02 | 993             | 294         | -1.75       |
| rno-miR-322-3p  | 2.14E-02 | 485             | 116         | -2.06       |
| rno-miR-152-3p  | 2.30E-02 | 1,223           | 405         | -1.59       |
| rno-miR-101b-3p | 2.38E-02 | 302             | 47          | -2.67       |
| rno-miR-221-3p  | 2.53E-02 | 552             | 282         | -0.97       |
| rno-miR-199a-5p | 2.65E-02 | 693             | 140         | -2.30       |
| rno-miR-140-3p  | 2.68E-02 | 448             | 171         | -1.39       |
| rno-miR-100-5p  | 2.71E-02 | 3,293           | 725         | -2.18       |
| rno-miR-451-5p  | 2.87E-02 | 3,701           | 473         | -2.97       |
| rno-miR-133a-5p | 2.95E-02 | 1,214           | 340         | -1.84       |
| rno-miR-24-2-5p | 2.98E-02 | 628             | 113         | -2.48       |
| rno-miR-106b-5p | 2.98E-02 | 364             | 53          | -2.79       |
| rno-miR-101a-3p | 3.02E-02 | 722             | 63          | -3.52       |
| rno-miR-378b    | 3.02E-02 | 2,019           | 1,210       | -0.74       |
| rno-miR-195-5p  | 3.05E-02 | 4,780           | 1,582       | -1.60       |
| rno-miR-28-5p   | 3.10E-02 | 516             | 177         | -1.54       |
| rno-miR-30a-5p  | 3.14E-02 | 8,318           | 2,872       | -1.53       |
| rno-miR-30e-5p  | 3.15E-02 | 6,530           | 1,186       | -2.46       |
| rno-miR-143-3p  | 3.23E-02 | 5,588           | 3,899       | -0.52       |
| rno-miR-20a-5p  | 3.27E-02 | 722             | 203         | -1.83       |
| rno-miR-16-5p   | 3.49E-02 | 4,862           | 1,459       | -1.74       |
| rno-miR-497-5p  | 3.54E-02 | 433             | 150         | -1.53       |
| rno-miR-30d-5p  | 3.74E-02 | 8,182           | 3,721       | -1.14       |
| rno-miR-378a-3p | 3.89E-02 | 2,406           | 1,489       | -0.69       |
| rno-miR-93-5p   | 4.11E-02 | 375             | 123         | -1.61       |
| rno-miR-342-3p  | 4.13E-02 | 602             | 312         | -0.95       |
| rno-miR-194-5p  | 4.23E-02 | 342             | 76          | -2.18       |
| rno-miR-25-3p   | 4.35E-02 | 1,004           | 590         | -0.77       |
| rno-miR-24-3p   | 4.36E-02 | 9,023           | 6,297       | -0.52       |
| rno-miR-145-3p  | 4.79E-02 | 833             | 160         | -2.38       |
| rno-miR-29c-3p  | 4.82E-02 | 5,855           | 689         | -3.09       |
